# Supplementary figures and images for: Effects of Ocean Ecosystem on Marine Aerosol‐Cloud Interaction
Source: Hindawi journal article supplement (doi:10.1155/2010/239808), 2010-01-01

Sand Island

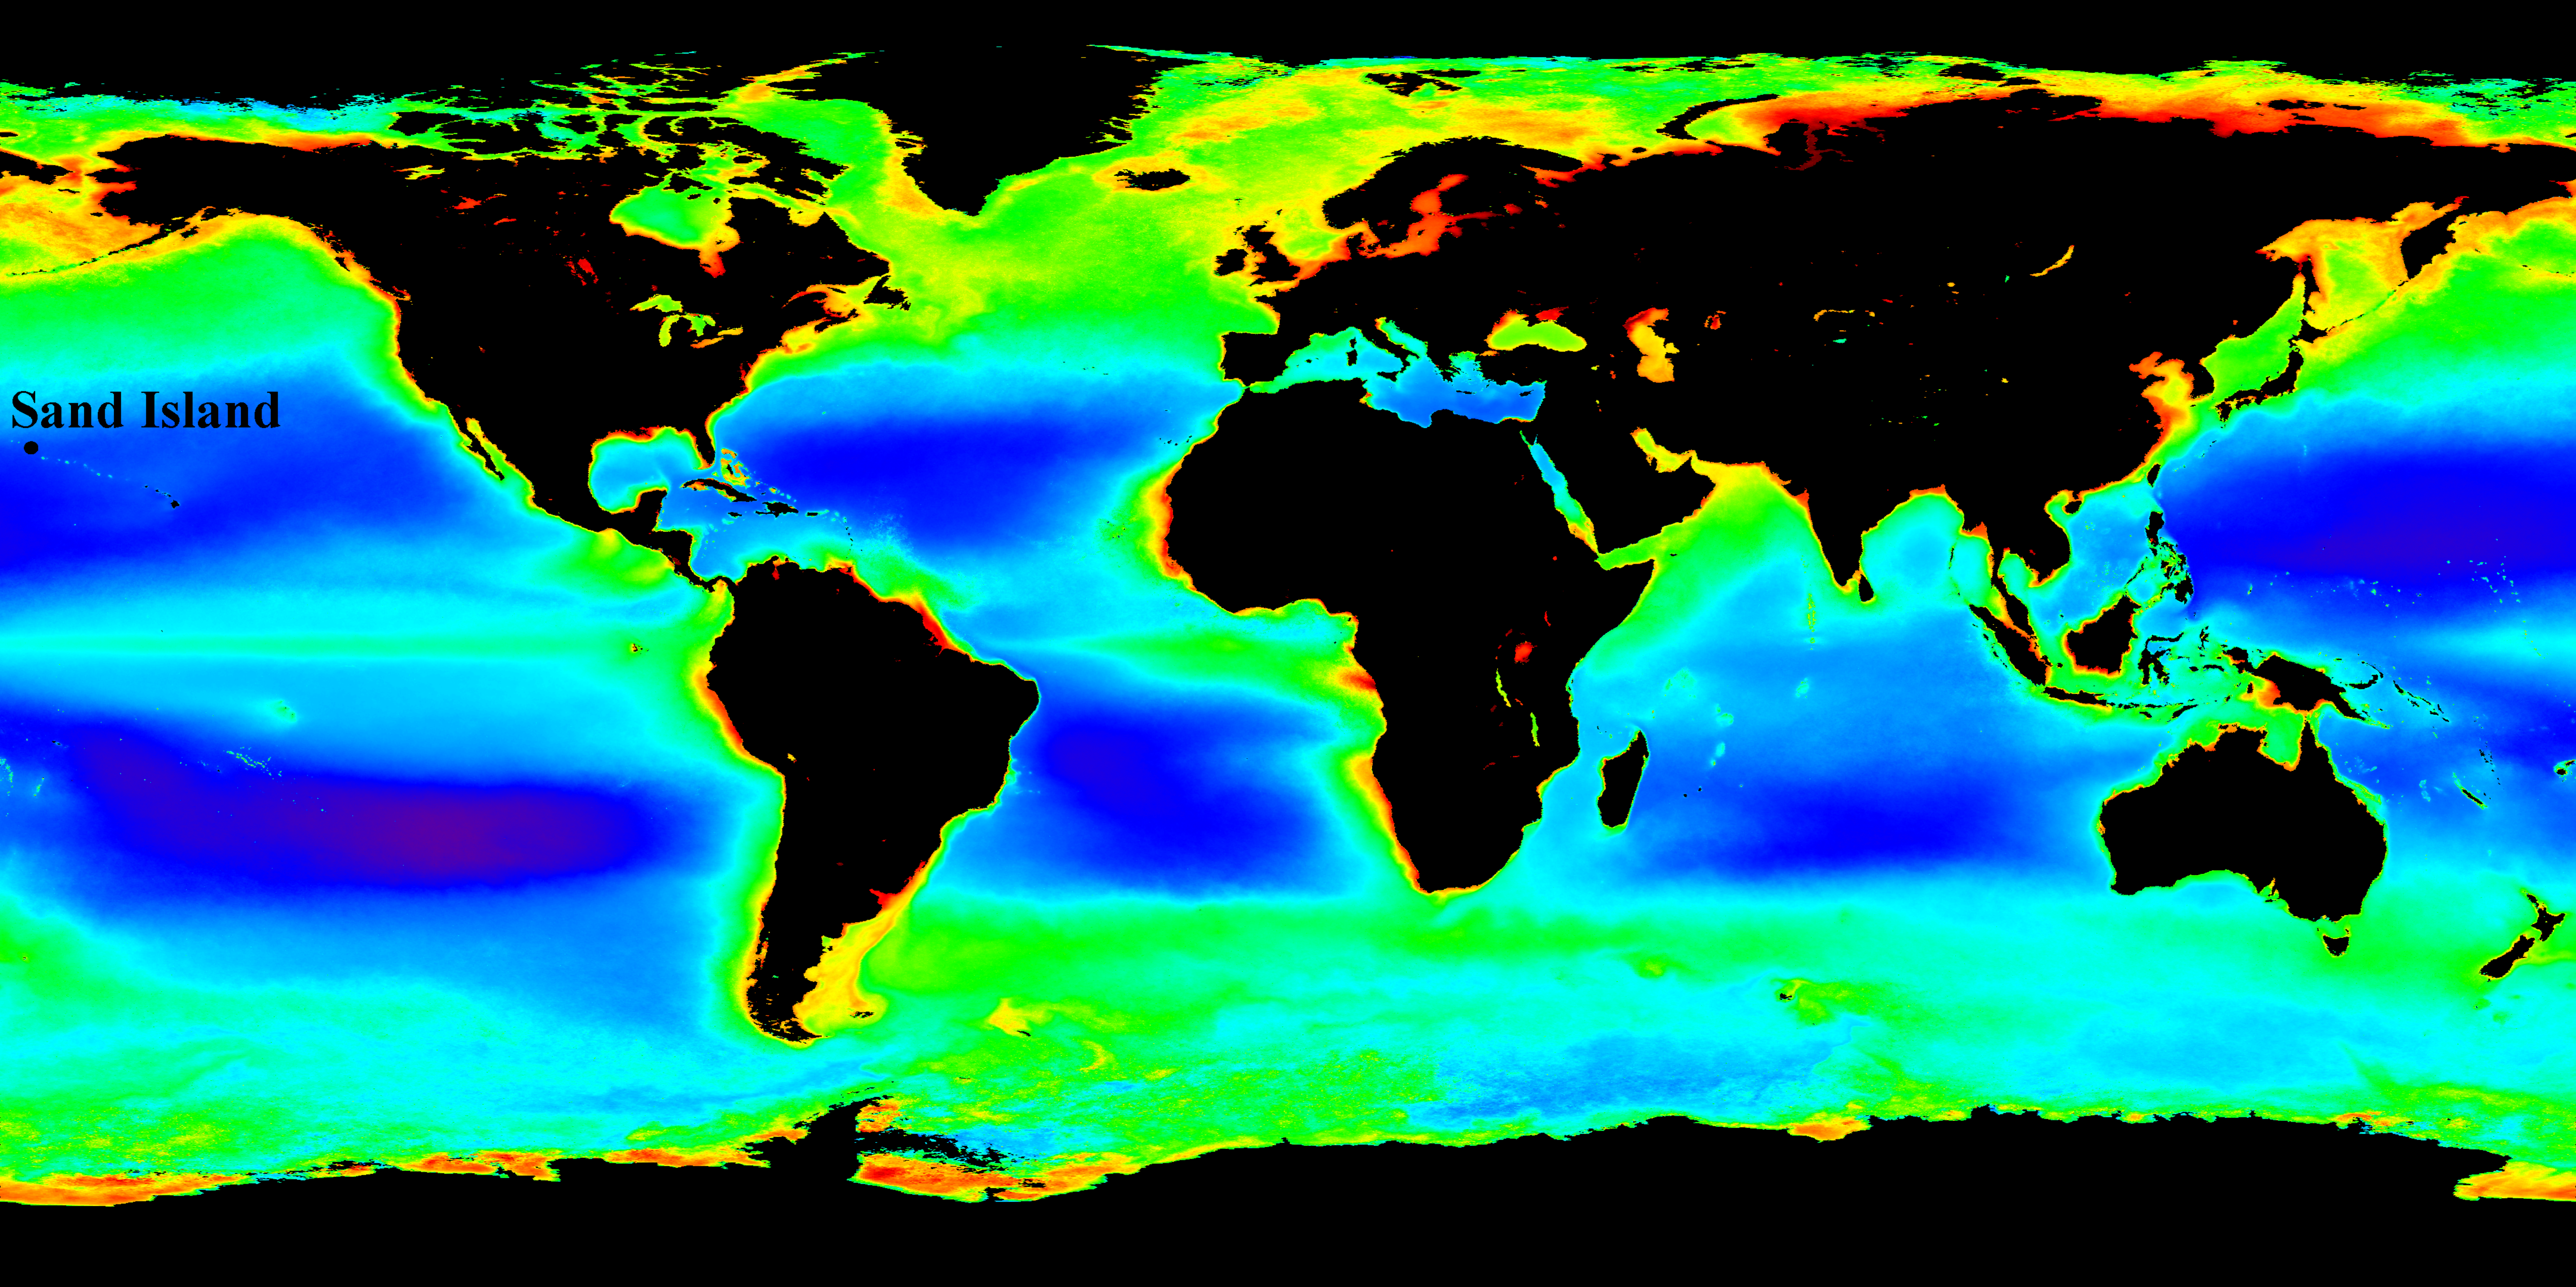

Chlorophyll *a* concentration ( mg / m<sup>3</sup> )

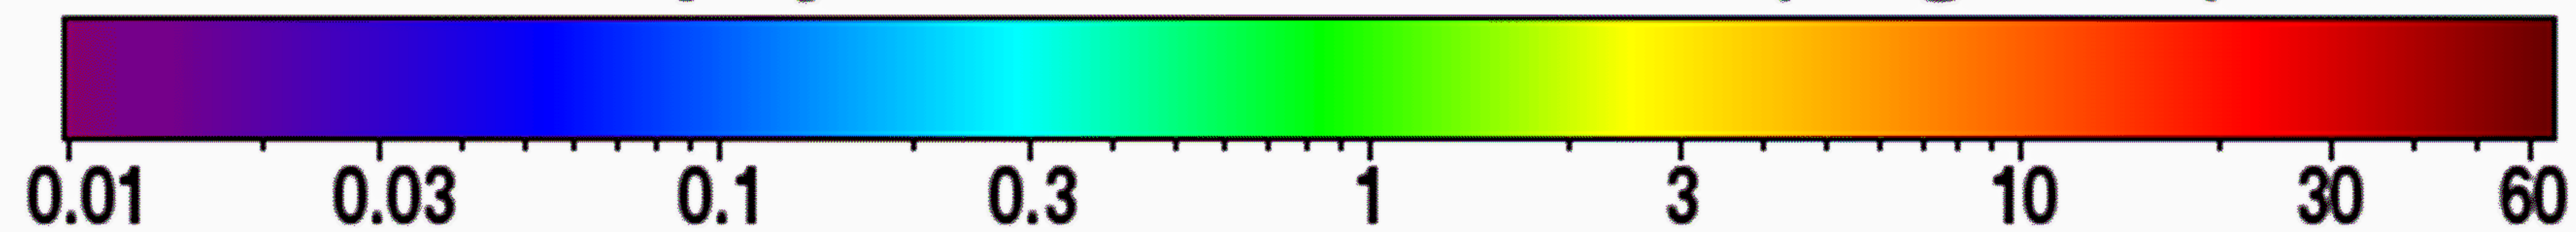

Supplement: f1 [file 239808.f1.pdf]
